# Supplementary material for: Accurate Prediction of Cancer Prognosis by Exploiting Patient-Specific Cancer Driver Genes
Source: MDPI journal article supplement (doi:10.3390/ijms24076445), 2023-03-29

**Figure S1. Comparison of various performance evaluation indeicators from 10 independent tests for each cancer.**

S1 a. Comparison of average the Precision-Recall curve AUC

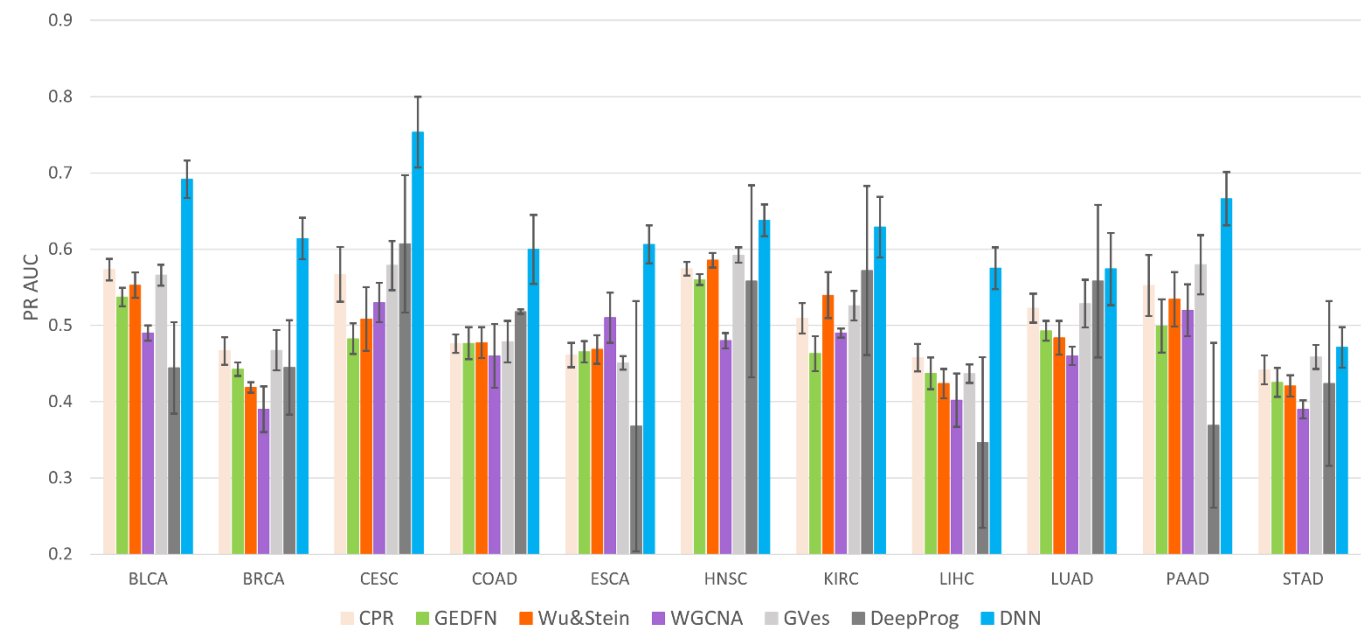

S1 b. Comparison of average balanced Accuracy

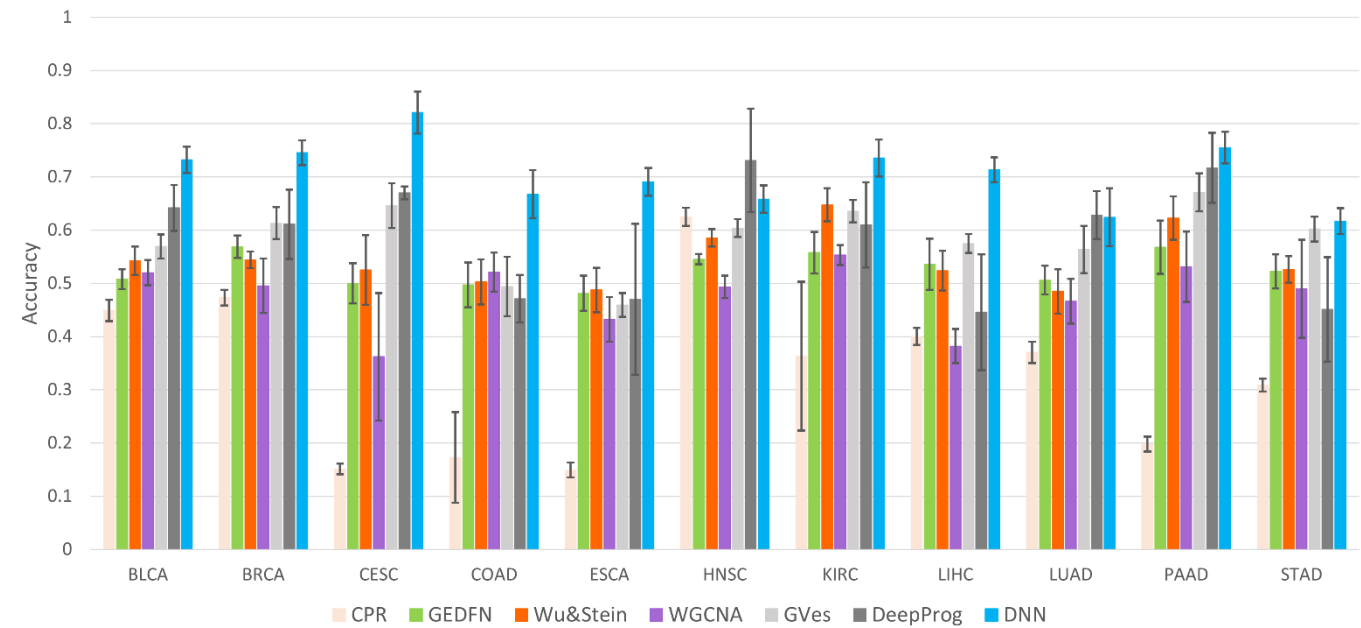

S1 c. Comparison of average F1-Score

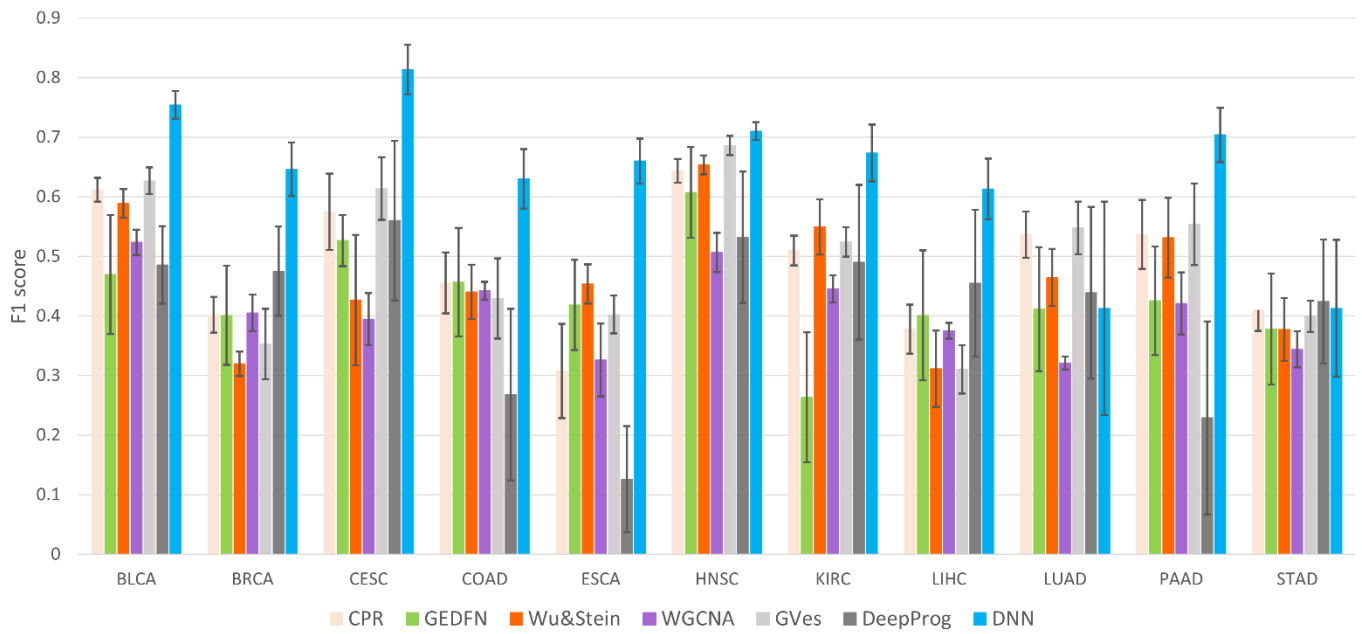

S1 d. Comparison of average Matthews Correlation Coefficient

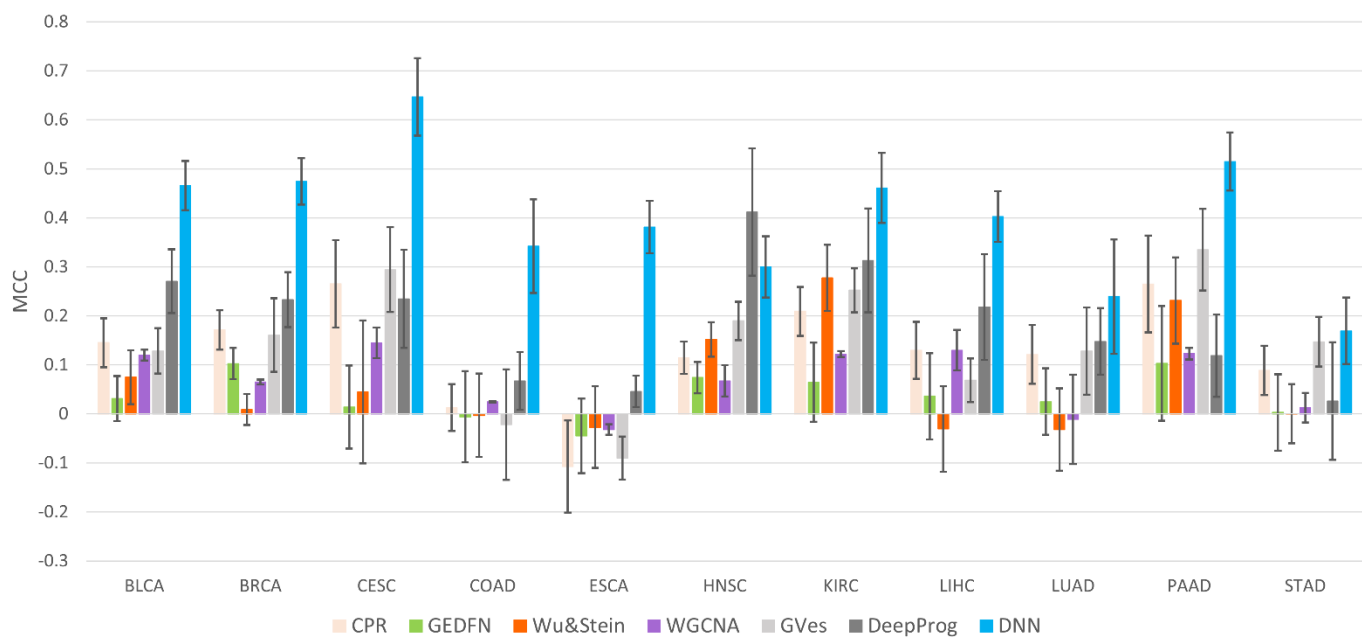

**Figure S2. Breast cancer genes with p-value < 0.05 in performing Kaplan Meyer analysis.**

S2 a. High-expressed gene group showing low survival probability

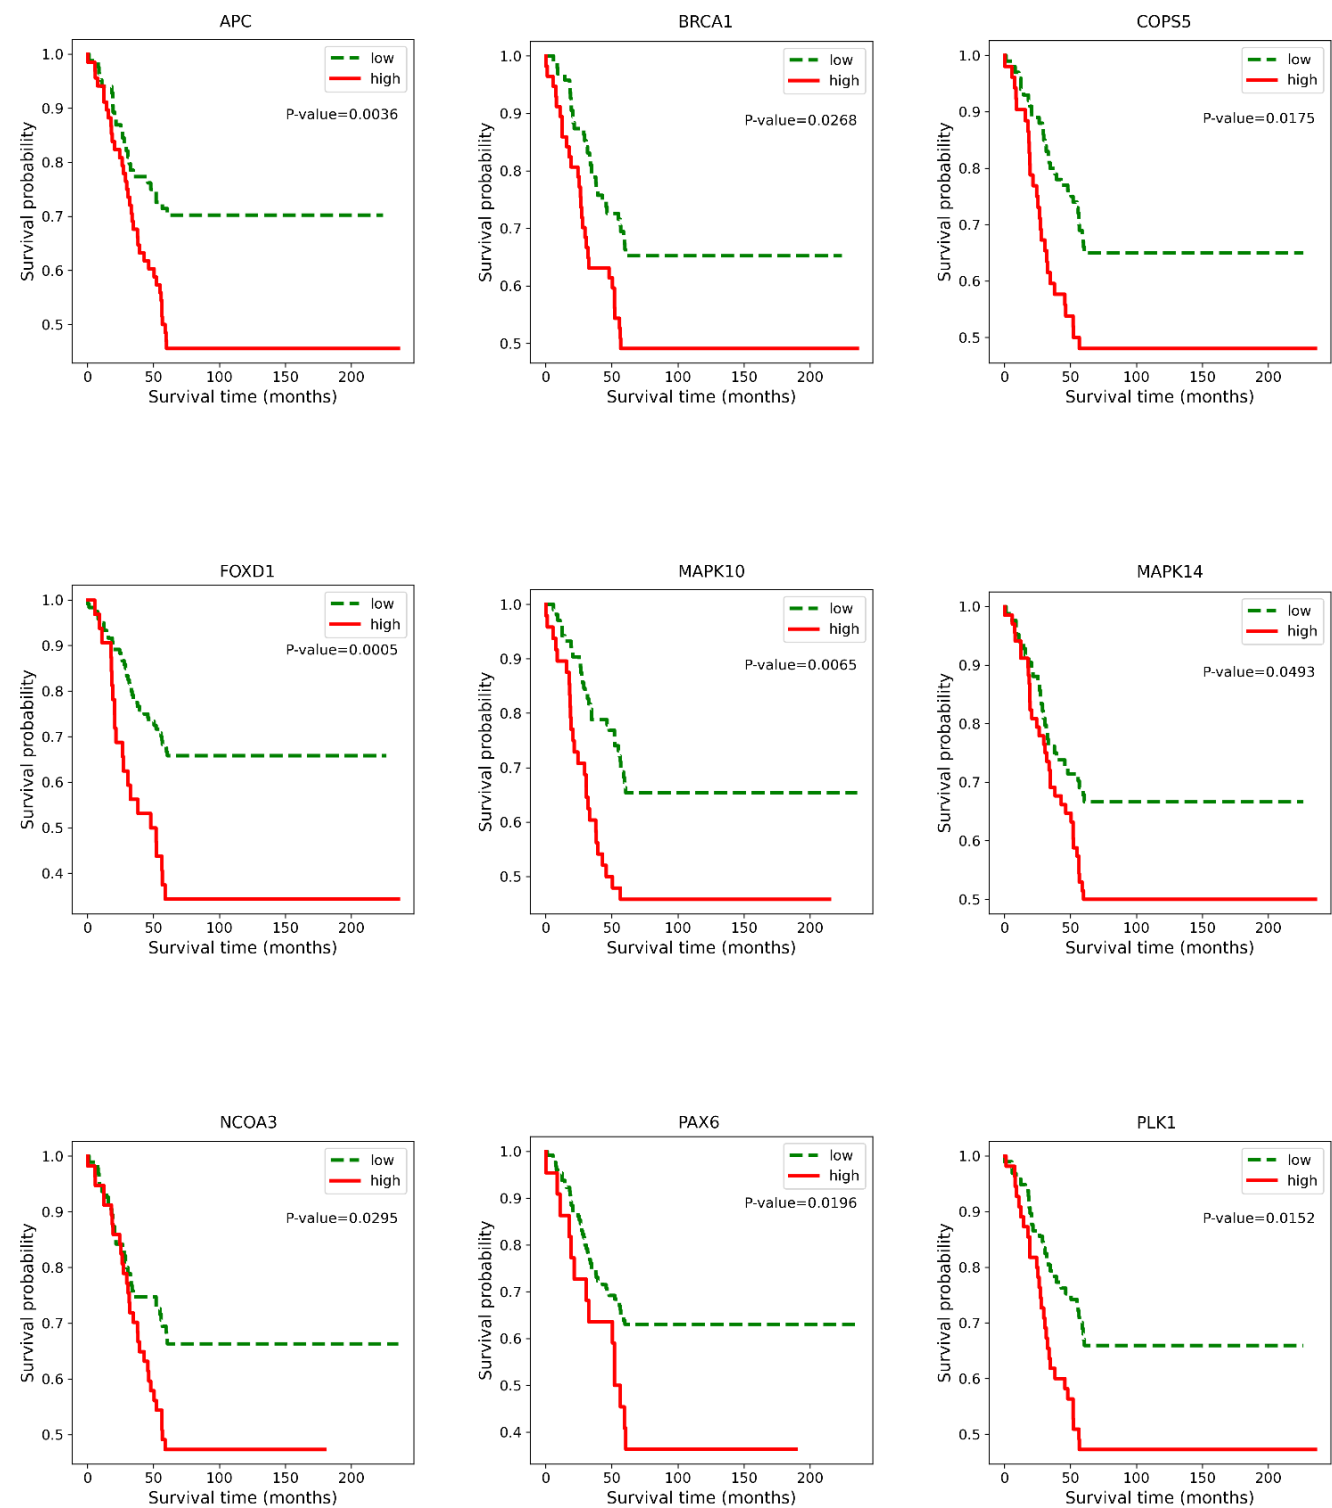

**Figure S2. Breast cancer genes with p-value < 0.05 in performing Kaplan Meyer analysis.**

S2 b. High-expressed gene group showing high survival probability

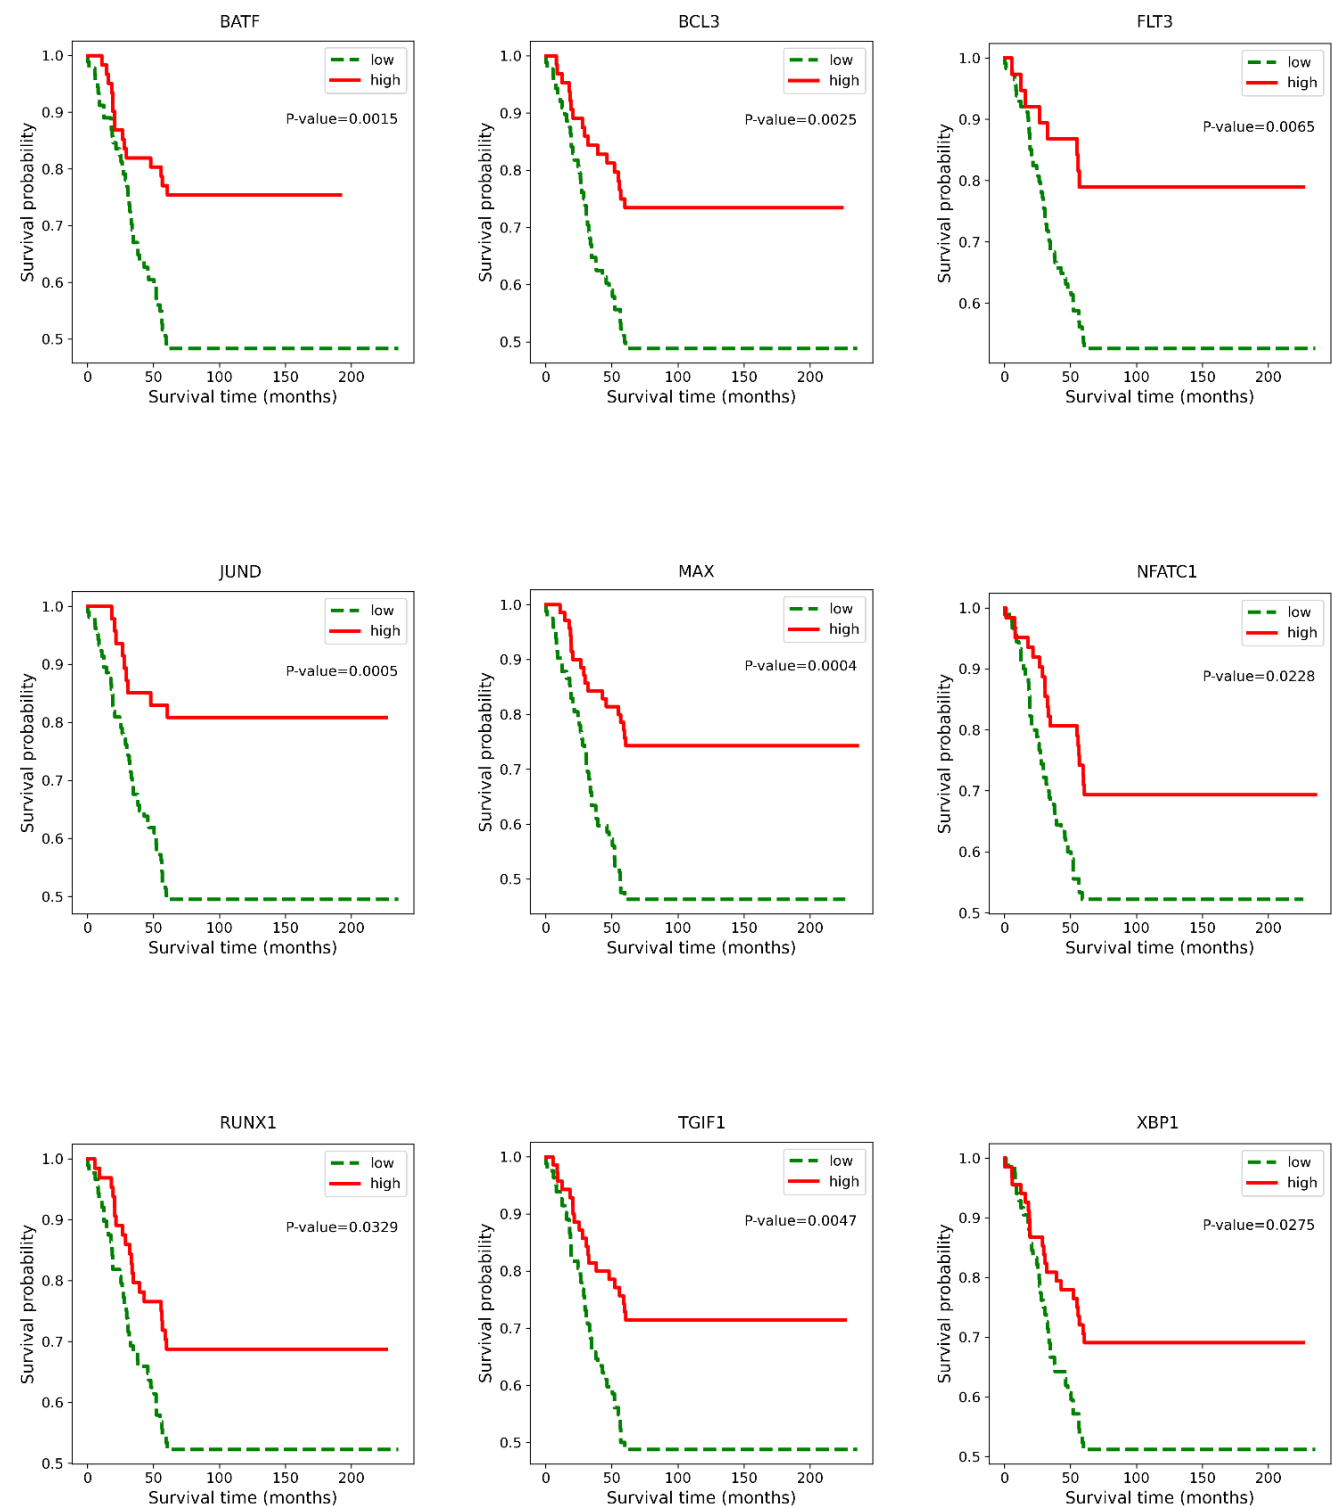

**Figure S3. Breast cancer genes with p-value < 0.05 in performing Kaplan Meyer analysis using KM ploatter web-site.**

S3 a. High-expressed gene group showing low survival probability

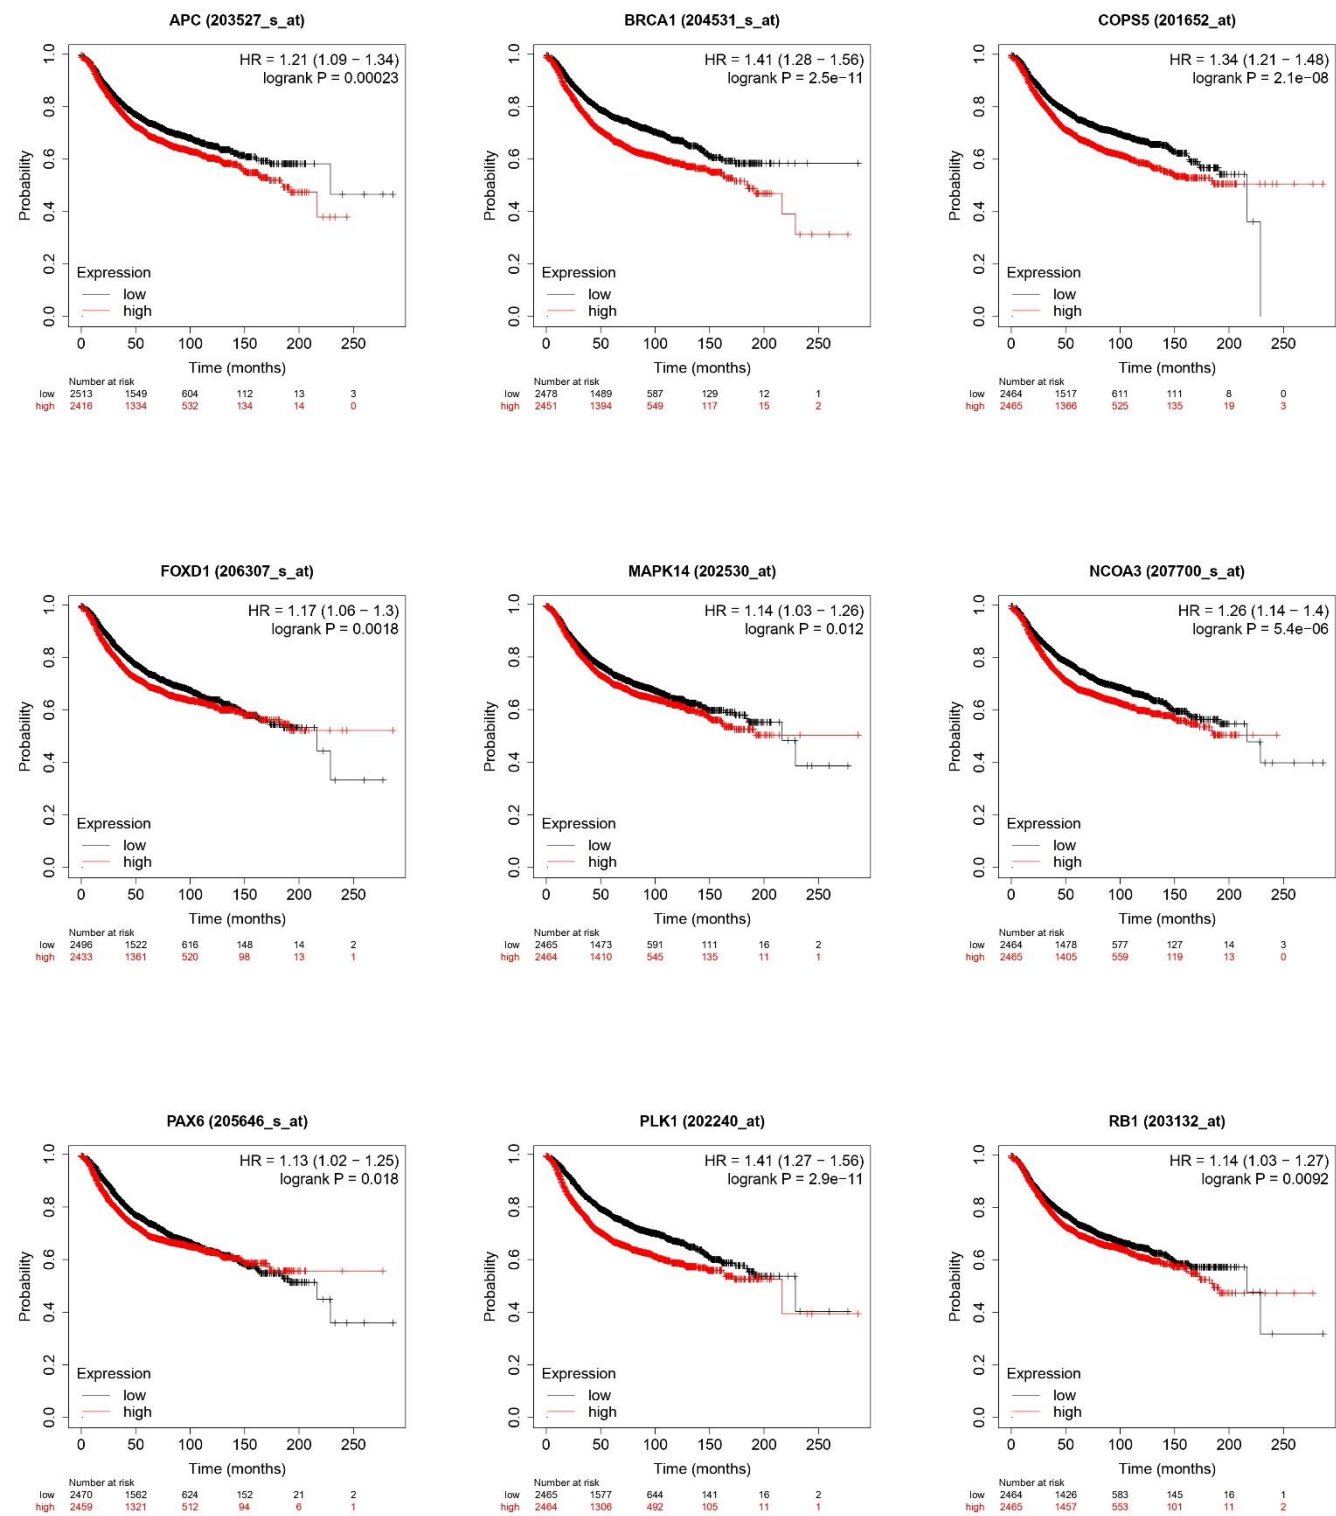

**Figure S3. Breast cancer genes with p-value < 0.05 in performing Kaplan Meyer analysis using KM plotter web-site.**

S3 b. High-expressed gene group showing high survival probability

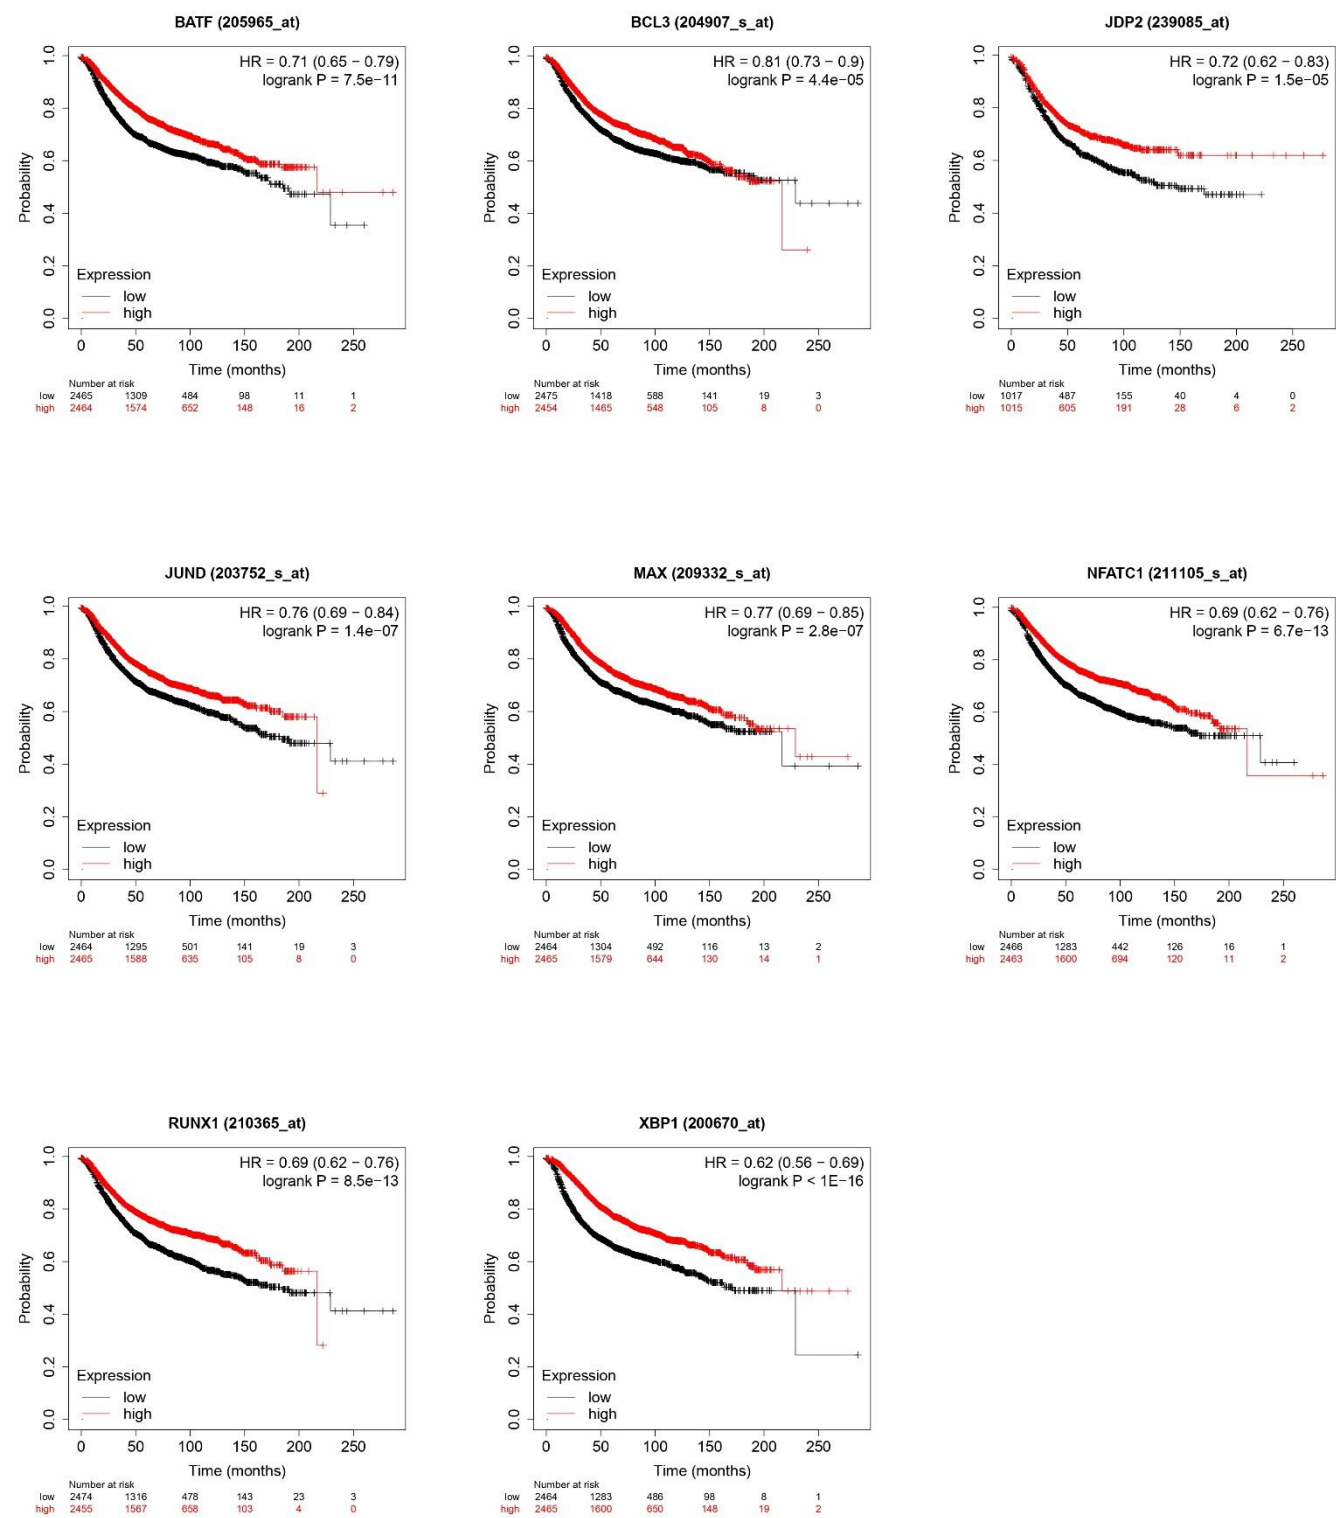

Figure S4. The correlation table of gene expression of breast cancer’s genes with immune infiltration level in breast cancer types.

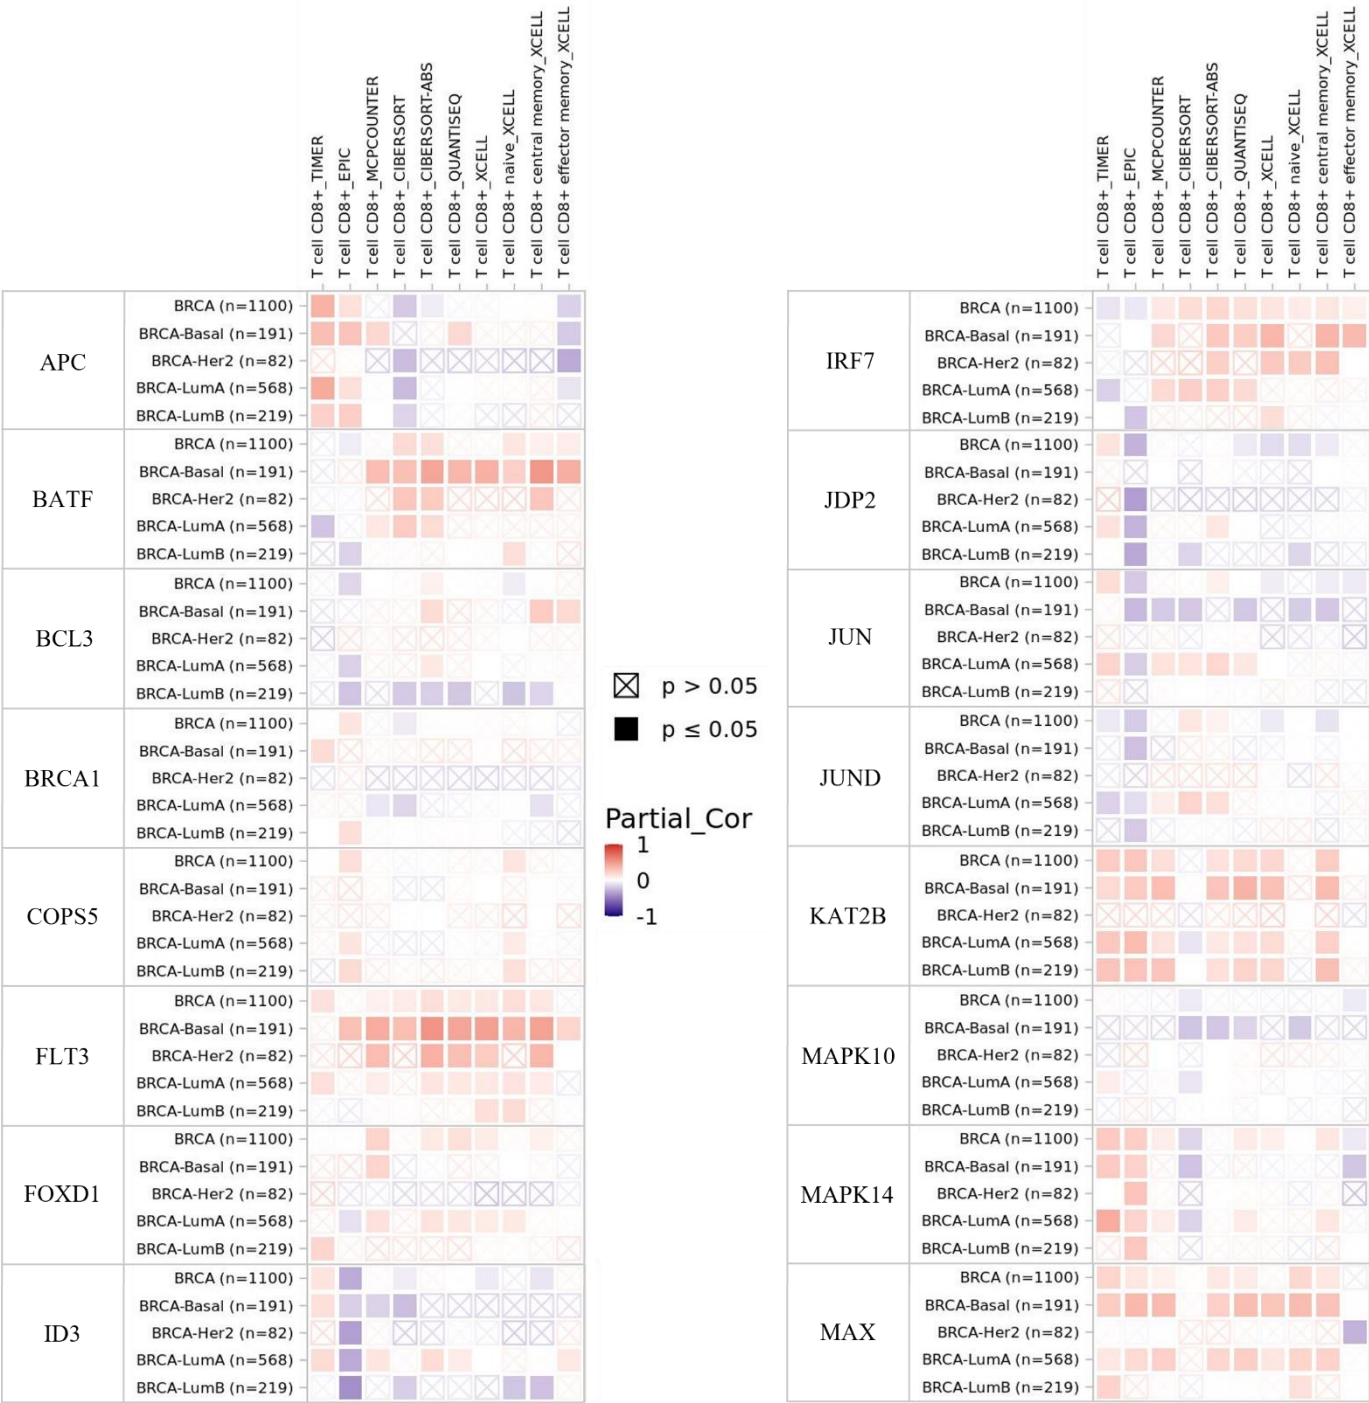

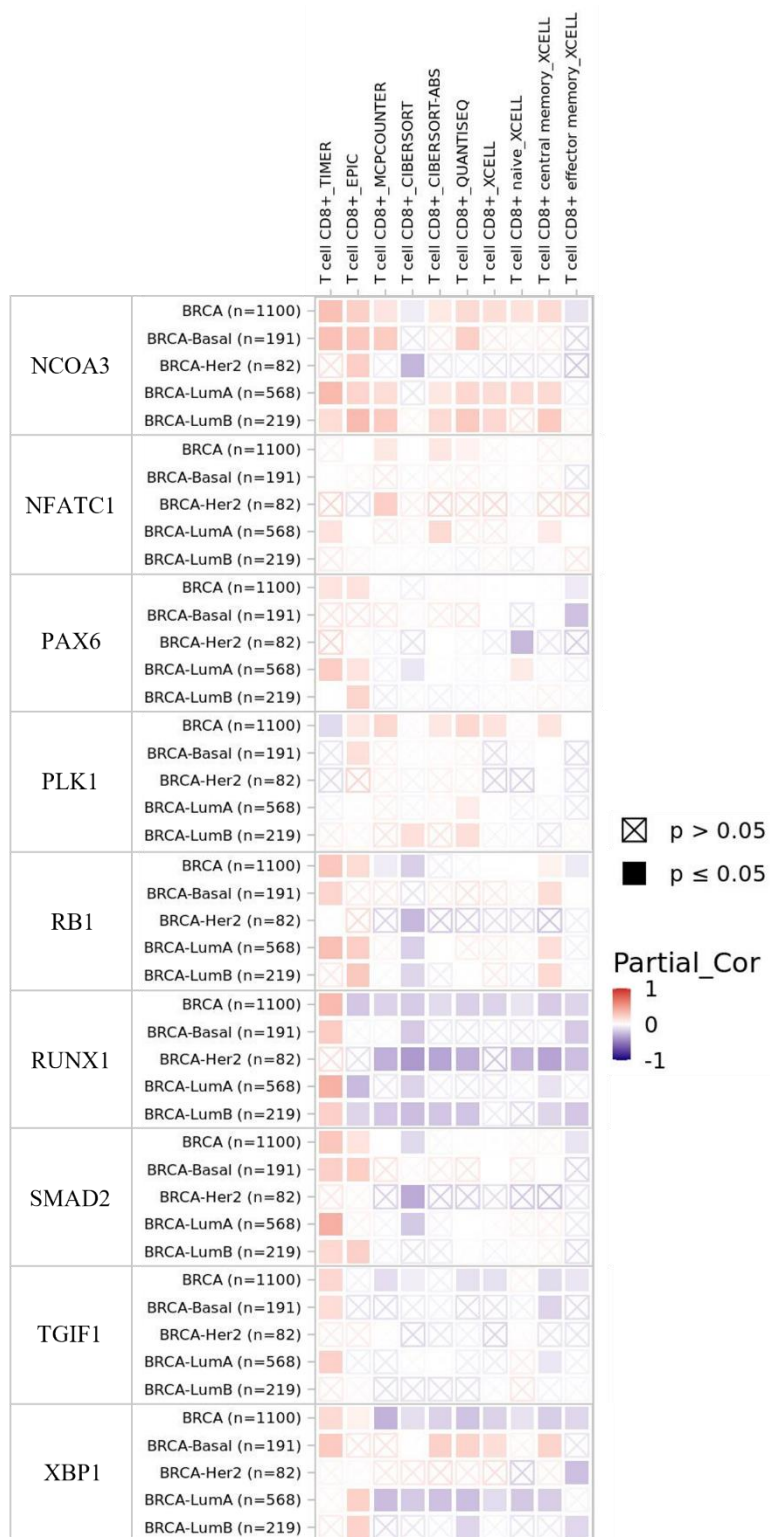



**Figure S5. Cervical cancer genes with p-value < 0.05 in performing Kaplan Meyer analysis.**

S5 a. High-expressed gene group showing low survival probability

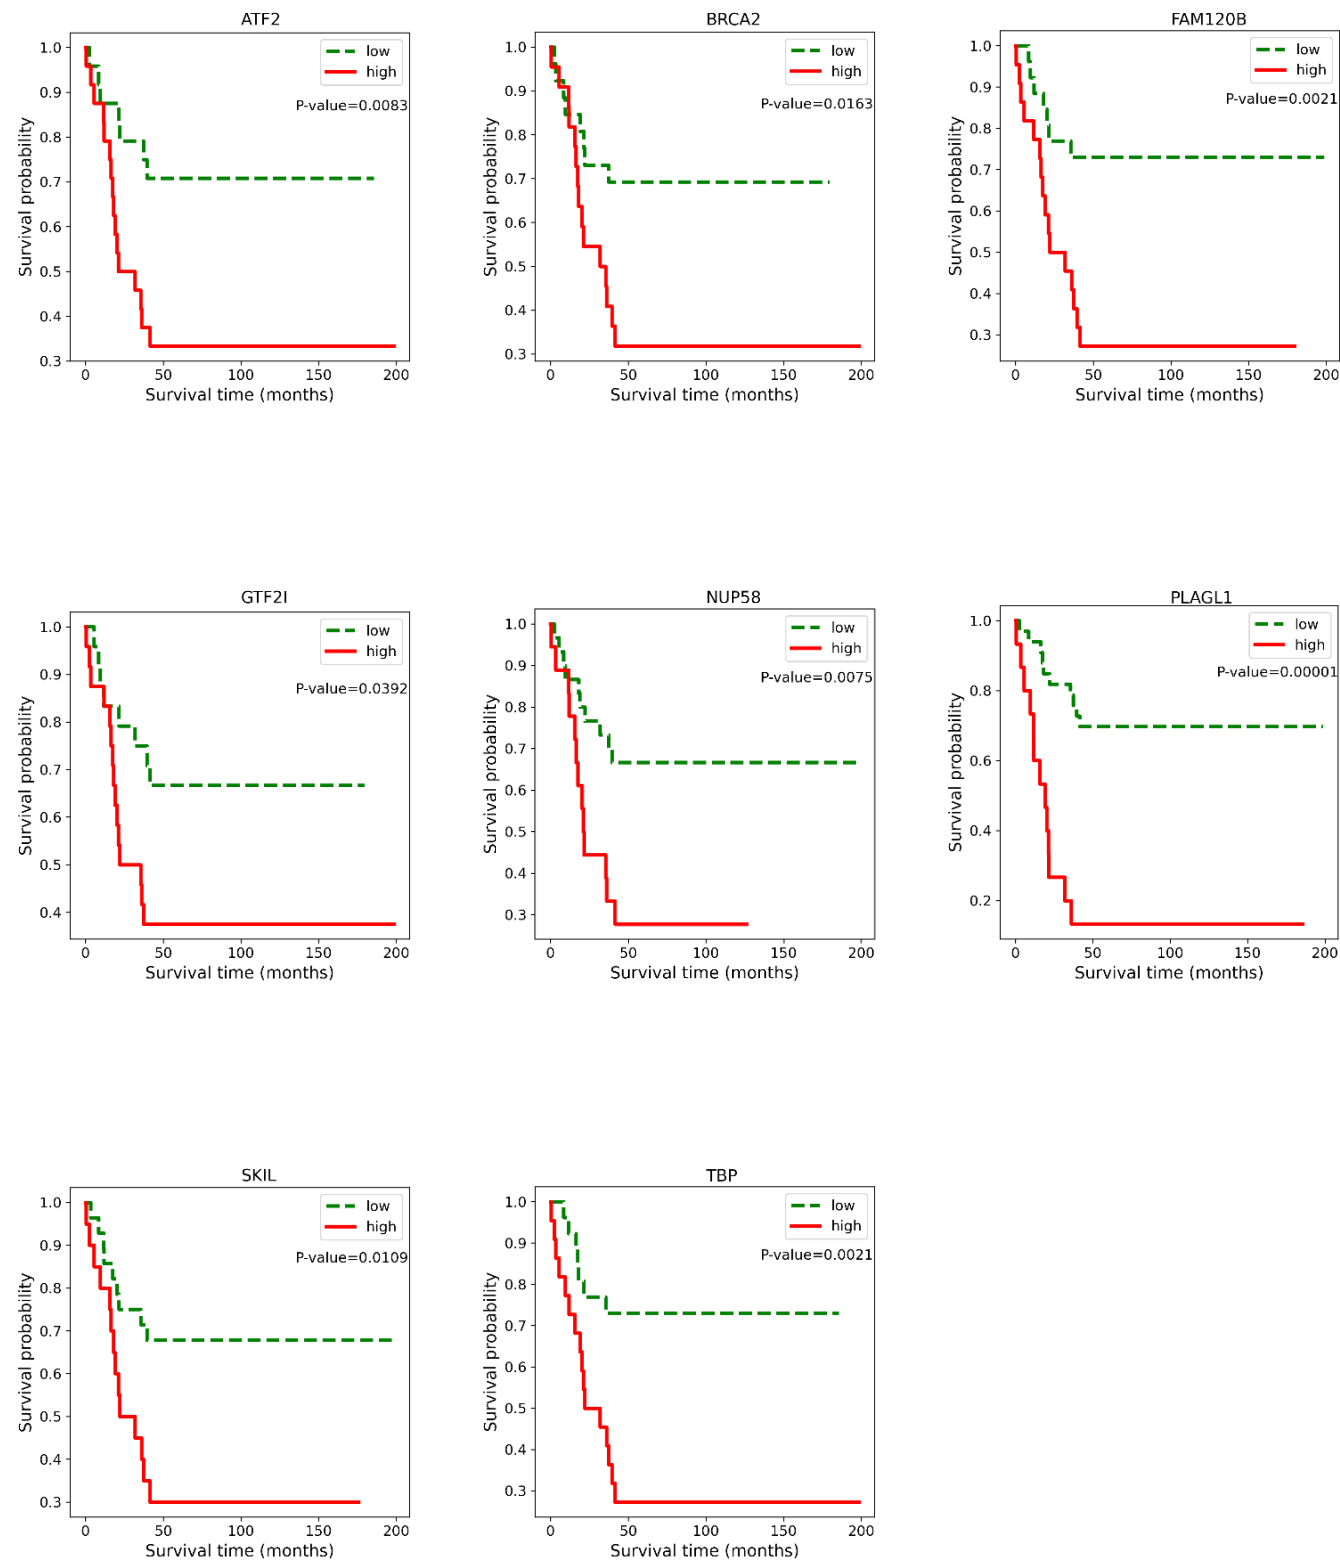

**Figure S5. Cervical cancer genes with p-value < 0.05 in performing Kaplan Meyer analysis.**

S5 b. High-expressed gene group showing high survival probability

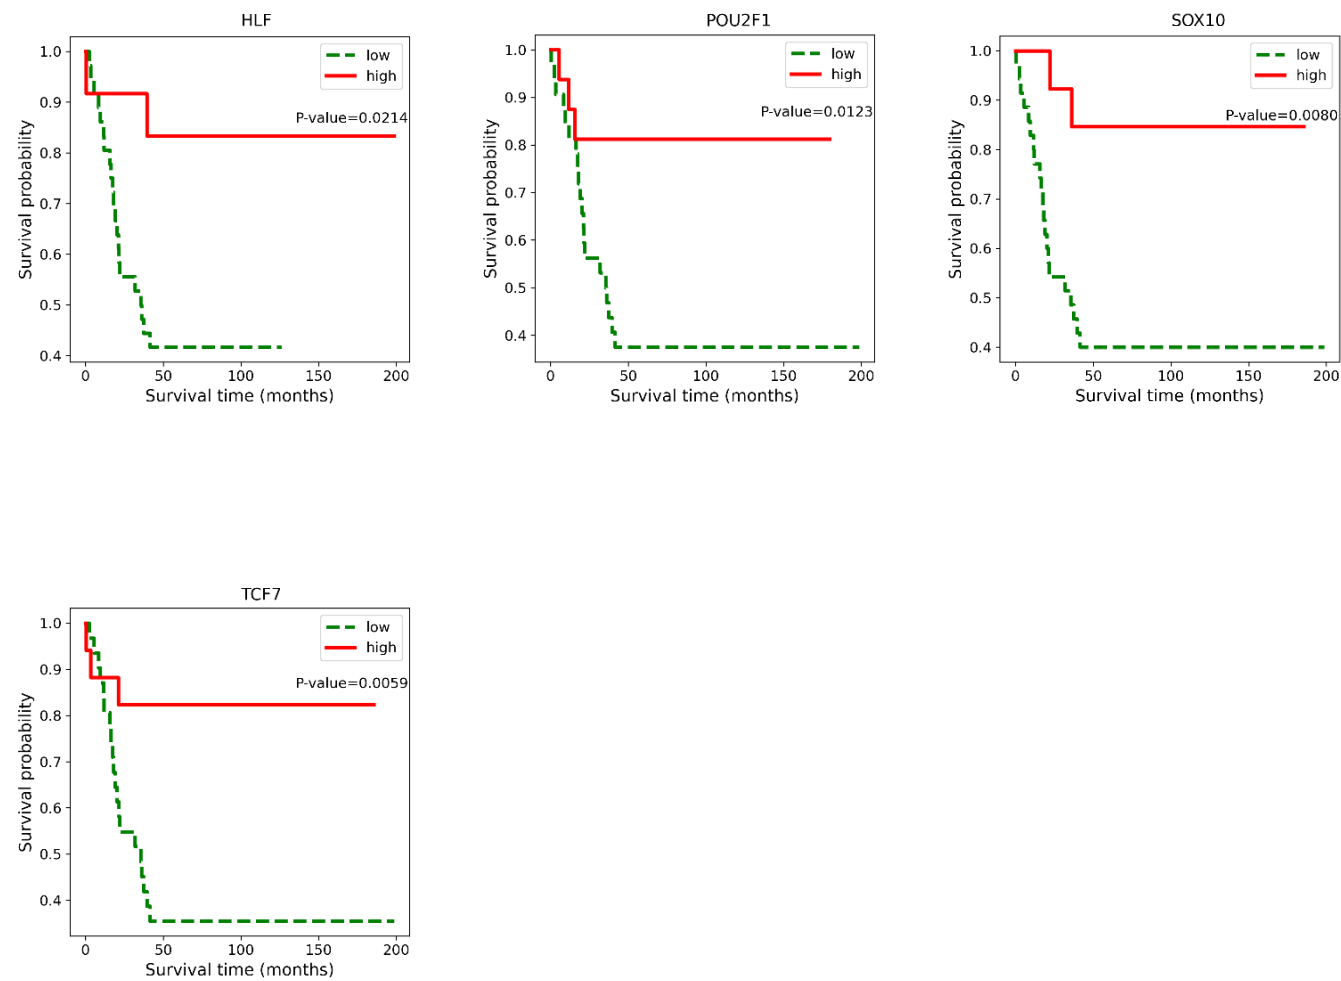

Supplement: s1 [file s1]
