# Supplementary material for: Accurate Prediction of Cancer Prognosis by Exploiting Patient-Specific Cancer Driver Genes
Source: Int J Mol Sci. 2023 Mar 29;24(7):6445. doi: 10.3390/ijms24076445 (PMC10095073; doi:10.3390/ijms24076445)
Supplement: Supplementary file 1 [file ijms-24-06445-s001.zip › Supplementary Tables.xlsx]

## Sheet: Cover
Supplementary Tables
No.	Title
Table S1	List of top 25 genes of BRCA
Table S2	Complete lists of GO terms and KEGG pathways in top 25 genes of BRCA
Table S3	List of top 20 genes of CESC
Table S4	Complete lists of GO terms and KEGG pathways in top 20 genes of CESC

## Sheet: Table S1
Table S1. List of top 25 genes of BRCA.
Gene	Count	Our Kaplan-Meyer analysis		KM Plotter (mRNA)		Kaplan-Meyer analysis using Protein Atlas
		direction*	p-value	direction*	p-value	direction*	p-value	Link
MAX	6	L	0.0004	L	2.8e-07	L	0.0045	https://www.proteinatlas.org/ENSG00000125952-MAX/pathology/breast+cancer
APC	5	H	0.0036	H	0.00023	H	0.048	https://www.proteinatlas.org/ENSG00000134982-APC/pathology/breast+cancer
FOXD1	5	H	0.0005	H	0.0018	H	0.00071	https://www.proteinatlas.org/ENSG00000251493-FOXD1/pathology/breast+cancer
TGIF1	5	L	0.0047	-	> 0.05	L	0.011	https://www.proteinatlas.org/ENSG00000177426-TGIF1/pathology/breast+cancer
MAPK10	4	H	0.0065	-	> 0.05	H	0.025	https://www.proteinatlas.org/ENSG00000109339-MAPK10/pathology/breast+cancer
NCOA3	4	H	0.0295	H	5.4e-06	H	0.0073	https://www.proteinatlas.org/ENSG00000124151-NCOA3/pathology/breast+cancer
BATF	4	L	0.0015	L	7.5e-11	L	0.0033	https://www.proteinatlas.org/ENSG00000156127-BATF/pathology/breast+cancer
COPS5	4	H	0.0175	H	2.1e-08	H	0.0019	https://www.proteinatlas.org/ENSG00000121022-COPS5/pathology/breast+cancer#ihc
IRF7	4	-	> 0.05	-	> 0.05	L	0.014	https://www.proteinatlas.org/ENSG00000185507-IRF7/pathology/breast+cancer
JUND	4	L	0.0005	L	1.4e-07	L	6.1e-05	https://www.proteinatlas.org/ENSG00000130522-JUND/pathology/breast+cancer
RUNX1	4	L	0.0329	L	8.5e-13	L	0.0041	https://www.proteinatlas.org/ENSG00000159216-RUNX1/pathology/breast+cancer
RB1	3	-	> 0.05	H	0.0092	H	0.0042	https://www.proteinatlas.org/ENSG00000139687-RB1/pathology/breast+cancer
JUN	3	-	> 0.05	-	> 0.05	-	> 0.05	-
KAT2B	3	-	> 0.05	-	> 0.05	H	0.029	https://www.proteinatlas.org/ENSG00000114166-KAT2B/pathology/breast+cancer
MAPK14	3	H	0.0493	H	0.012	H	0.0068	https://www.proteinatlas.org/ENSG00000112062-MAPK14/pathology/breast+cancer
JDP2	3	-	> 0.05	L	1.5e-05	L	0.032	https://www.proteinatlas.org/ENSG00000140044-JDP2/pathology/breast+cancer
ID3	3	-	> 0.05	-	> 0.05	-	> 0.05	-
PAX6	3	H	0.0196	H	0.018	-	> 0.05	-
NFATC1	3	L	0.0228	L	6.7e-13	L	0.035	https://www.proteinatlas.org/ENSG00000131196-NFATC1/pathology/breast+cancer
SMAD2	3	-	> 0.05	-	> 0.05	-	> 0.05	-
FLT3	3	L	0.0065	-	> 0.05	L	0.0022	https://www.proteinatlas.org/ENSG00000122025-FLT3/pathology/breast+cancer
BRCA1	3	H	0.0268	H	2.5e-11	H	0.0079	https://www.proteinatlas.org/ENSG00000012048-BRCA1/pathology/breast+cancer
BCL3	3	L	0.0025	L	4.4e-05	L	0.00097	https://www.proteinatlas.org/ENSG00000069399-BCL3/pathology/breast+cancer
PLK1	3	H	0.0152	H	2.9e-11	H	0.0072	https://www.proteinatlas.org/ENSG00000166851-PLK1/pathology/breast+cancer
XBP1	3	L	0.0275	L	< 1.00E-16	-	> 0.05	-
* H: low survival on high expression, L: low survival on low expression

## Sheet: Table S2
Table S2. Complete lists of GO terms and KEGG pathways in top 25 genes of BRCA.
Category	Term	Count	Genes	P-value
KEGG_PATHWAY	hsa04659:Th17 cell differentiation	6	MAPK10, SMAD2, JUN, NFATC1, MAPK14, RUNX1	6.37643e-06
KEGG_PATHWAY	hsa05161:Hepatitis B	6	MAPK10, RB1, JUN, IRF7, NFATC1, MAPK14	4.57171e-05
KEGG_PATHWAY	hsa04010:MAPK signaling pathway	7	MAPK10, JUN, JUND, FLT3, MAX, NFATC1, MAPK14	7.15596e-05
KEGG_PATHWAY	hsa01522:Endocrine resistance	5	MAPK10, RB1, JUN, NCOA3, MAPK14	0.000100278
KEGG_PATHWAY	hsa05417:Lipid and atherosclerosis	6	MAPK10, XBP1, JUN, IRF7, NFATC1, MAPK14	0.000175122
KEGG_PATHWAY	hsa05224:Breast cancer	5	RB1, JUN, APC, NCOA3, BRCA1	0.00047748
KEGG_PATHWAY	hsa05235:PD-L1 expression and PD-1 checkpoint pathway in cancer	4	JUN, NFATC1, MAPK14, BATF	0.00144915
KEGG_PATHWAY	hsa04658:Th1 and Th2 cell differentiation	4	MAPK10, JUN, NFATC1, MAPK14	0.00159455
KEGG_PATHWAY	hsa04657:IL-17 signaling pathway	4	MAPK10, JUN, JUND, MAPK14	0.0016964
KEGG_PATHWAY	hsa04620:Toll-like receptor signaling pathway	4	MAPK10, JUN, IRF7, MAPK14	0.0022668
KEGG_PATHWAY	hsa04310:Wnt signaling pathway	4	MAPK10, JUN, APC, NFATC1	0.00897841
KEGG_PATHWAY	hsa04625:C-type lectin receptor signaling pathway	5	MAPK10, JUN, BCL3, NFATC1, MAPK14	0.000126369
KEGG_PATHWAY	hsa04380:Osteoclast differentiation	5	MAPK10, JUN, JUND, NFATC1, MAPK14	0.000281631
KEGG_PATHWAY	hsa04550:Signaling pathways regulating pluripotency of stem cells	5	SMAD2, APC, ID3, PAX6, MAPK14	0.00042997
KEGG_PATHWAY	hsa05210:Colorectal cancer	4	MAPK10, SMAD2, JUN, APC	0.00131243
KEGG_PATHWAY	hsa05169:Epstein-Barr virus infection	5	MAPK10, RB1, JUN, IRF7, MAPK14	0.00157002
KEGG_PATHWAY	hsa04660:T cell receptor signaling pathway	4	MAPK10, JUN, NFATC1, MAPK14	0.0022668
KEGG_PATHWAY	hsa04668:TNF signaling pathway	4	MAPK10, JUN, BCL3, MAPK14	0.00279981
KEGG_PATHWAY	hsa04926:Relaxin signaling pathway	4	MAPK10, SMAD2, JUN, MAPK14	0.00417434
KEGG_PATHWAY	hsa04932:Non-alcoholic fatty liver disease	4	MAPK10, XBP1, JUN, MAPK14	0.00696405
KEGG_PATHWAY	hsa04218:Cellular senescence	4	RB1, SMAD2, NFATC1, MAPK14	0.00708888
KEGG_PATHWAY	hsa05200:Pathways in cancer	9	MAPK10, RB1, SMAD2, JUN, APC, FLT3, MAX, NCOA3, RUNX1	2.92191e-05
KEGG_PATHWAY	hsa05167:Kaposi sarcoma-associated herpesvirus infection	6	MAPK10, RB1, JUN, IRF7, NFATC1, MAPK14	0.000107904
KEGG_PATHWAY	hsa04933:AGE-RAGE signaling pathway in diabetic complications	5	MAPK10, SMAD2, JUN, NFATC1, MAPK14	0.00010849
KEGG_PATHWAY	hsa05166:Human T-cell leukemia virus 1 infection	6	MAPK10, RB1, SMAD2, KAT2B, JUN, NFATC1	0.000203481
KEGG_PATHWAY	hsa05142:Chagas disease	4	MAPK10, SMAD2, JUN, MAPK14	0.00214438
KEGG_PATHWAY	hsa05135:Yersinia infection	4	MAPK10, JUN, NFATC1, MAPK14	0.00494121
GOTERM_BP_DIRECT	GO:0045944~positive regulation of transcription from RNA polymerase II promoter	18	RB1, SMAD2, XBP1, JUN, JUND, FOXD1, MAX, NCOA3, NFATC1, PAX6, BRCA1, MAPK14, BATF, RUNX1, KAT2B, COPS5, BCL3, IRF7	6.52155e-16
GOTERM_BP_DIRECT	GO:0006357~regulation of transcription from RNA polymerase II promoter	16	RB1, TGIF1, SMAD2, XBP1, JUN, JUND, FOXD1, MAX, NFATC1, PAX6, BRCA1, MAPK14, BATF, RUNX1, IRF7, JDP2	1.05125e-10
GOTERM_BP_DIRECT	GO:0000122~negative regulation of transcription from RNA polymerase II promoter	13	RB1, TGIF1, XBP1, JUN, JUND, MAX, PLK1, PAX6, RUNX1, MAPK10, IRF7, ID3, JDP2	3.71576e-10
GOTERM_BP_DIRECT	GO:0006366~transcription from RNA polymerase II promoter	6	RB1, XBP1, JUN, JUND, PAX6, MAPK14	1.0104e-05
GOTERM_BP_DIRECT	GO:0006974~cellular response to DNA damage stimulus	5	APC, BCL3, IRF7, BRCA1, BATF	0.000350008
GOTERM_BP_DIRECT	GO:0010628~positive regulation of gene expression	6	SMAD2, FOXD1, ID3, PAX6, BRCA1, MAPK14	0.00036768
GOTERM_BP_DIRECT	GO:0010629~negative regulation of gene expression	5	RB1, SMAD2, TGIF1, MAX, ID3	0.000529731
GOTERM_BP_DIRECT	GO:0051726~regulation of cell cycle	9	RB1, KAT2B, JUN, COPS5, JUND, APC, PLK1, ID3, BRCA1	2.81794e-09
GOTERM_BP_DIRECT	GO:0045893~positive regulation of transcription, DNA-templated	10	SMAD2, KAT2B, JUN, MAX, BCL3, IRF7, NFATC1, PAX6, BRCA1, RUNX1	1.02312e-07
GOTERM_BP_DIRECT	GO:0045892~negative regulation of transcription, DNA-templated	7	RB1, SMAD2, JUN, FOXD1, BCL3, ID3, BRCA1	6.77604e-05
GOTERM_BP_DIRECT	GO:0045736~negative regulation of cyclin-dependent protein serine/threonine kinase activity	3	KAT2B, APC, PLK1	0.000767737

## Sheet: Table S3
Table S3. List of top 20 genes of CESC.
Gene	Count	Our Kaplan-Meyer analysis		Kaplan-Meyer analysis using Protein Atlas
		direction*	p-value	direction*	p-value	Link
TBP	7	H	0.0021	-	> 0.05	-
BRCA2	4	H	0.0163	-	> 0.05	-
ATF2	4	H	0..0083	-	> 0.05	-
POU2F1	4	L	0.0123	-	> 0.05	-
NOTCH4	4	-	> 0.05	-	> 0.05	-
SKIL	4	H	0.0109	H	0.017	https://www.proteinatlas.org/ENSG00000136603-SKIL/pathology/cervical+cancer
KDM5B	3	-	> 0.05	H	0.017	https://www.proteinatlas.org/ENSG00000117139-KDM5B/pathology/cervical+cancer
TCF7	3	L	0.0059	L	0.002	https://www.proteinatlas.org/ENSG00000081059-TCF7/pathology/cervical+cancer
RPS6KB2	3	-	> 0.05	L	0.0024	https://www.proteinatlas.org/ENSG00000175634-RPS6KB2/pathology/cervical+cancer
NUP58	3	H	0.0075	H	0.00026	https://www.proteinatlas.org/ENSG00000139496-NUP58/pathology/cervical+cancer
PLAGL1	3	H	1e-05	H	0.0083	https://www.proteinatlas.org/ENSG00000118495-PLAGL1/pathology/cervical+cancer
NFYA	3	-	> 0.05	H	0.045	https://www.proteinatlas.org/ENSG00000001167-NFYA/pathology/cervical+cancer
HLF	3	L	0.0214	L	0.0012	https://www.proteinatlas.org/ENSG00000108924-HLF/pathology/cervical+cancer
TCF12	3	-	> 0.05	-	> 0.05	-
ATF6	3	-	> 0.05	-	> 0.05	-
SOX10	3	L	0.008	-	> 0.05	-
TGFB1	3	-	> 0.05	H	0.0054	https://www.proteinatlas.org/ENSG00000105329-TGFB1/pathology/cervical+cancer
FAM120B	3	H	0.0021	-	> 0.05	-
PTTG1	3	-	> 0.05	L	0.01	https://www.proteinatlas.org/ENSG00000164611-PTTG1/pathology/cervical+cancer
GTF2I	3	H	0.0392	H	0.023	https://www.proteinatlas.org/ENSG00000263001-GTF2I/pathology/cervical+cancer
* H: low survival on high expression, L: low survival on low expression

## Sheet: Table S4
Table S4. Complete lists of GO terms and KEGG pathways in top 20 genes of CESC.
Category	Term	Count	Genes	P-value
KEGG_PATHWAY	hsa05166:Human T-cell leukemia virus 1 infection	4	ATF2, TGFB1, TBP, PTTG1	0.00457211
KEGG_PATHWAY	hsa05165:Human papillomavirus infection	4	TBP, NOTCH4, TCF7, RPS6KB2	0.0137654
KEGG_PATHWAY	hsa05210:Colorectal cancer	3	TGFB1, TCF7, RPS6KB2	0.00785796
KEGG_PATHWAY	hsa05226:Gastric cancer	3	TGFB1, TCF7, RPS6KB2	0.0224097
KEGG_PATHWAY	hsa05225:Hepatocellular carcinoma	3	TGFB1, TCF7, RPS6KB2	0.0280325
KEGG_PATHWAY	hsa05224:Breast cancer	4	NOTCH4, TCF7, RPS6KB2, BRCA2	0.00141244
KEGG_PATHWAY	hsa05212:Pancreatic cancer	3	TGFB1, RPS6KB2, BRCA2	0.00618222
KEGG_PATHWAY	hsa05200:Pathways in cancer	5	TGFB1, NOTCH4, TCF7, RPS6KB2, BRCA2	0.00775112
KEGG_PATHWAY	hsa03022:Basal transcription factors	2	TBP, GTF2I	0.0690472
GOTERM_BP_DIRECT	GO:0010628~positive regulation of gene expression	5	ATF2, KDM5B, TGFB1, TCF12, SOX10	0.00150617
GOTERM_BP_DIRECT	GO:0048511~rhythmic process	3	KDM5B, HLF, NFYA	0.0025624
GOTERM_BP_DIRECT	GO:0042306~regulation of protein import into nucleus	2	TGFB1, NUP58	0.00783663
GOTERM_BP_DIRECT	GO:0007283~spermatogenesis	4	TBP, PTTG1, BRCA2, SKIL	0.00959385
GOTERM_BP_DIRECT	GO:0006366~transcription from RNA polymerase II promoter	3	TBP, NFYA, GTF2I	0.0235531
GOTERM_BP_DIRECT	GO:0051726~regulation of cell cycle	3	TGFB1, PLAGL1, SKIL	0.0396861
GOTERM_BP_DIRECT	GO:0043967~histone H4 acetylation	2	ATF2, BRCA2	0.0414429
GOTERM_BP_DIRECT	GO:0001837~epithelial to mesenchymal transition	2	TGFB1, NOTCH4	0.0470946
GOTERM_BP_DIRECT	GO:1902895~positive regulation of pri-miRNA transcription from RNA polymerase II promoter	2	TGFB1, POU2F1	0.0499086
GOTERM_BP_DIRECT	GO:0045944~positive regulation of transcription from RNA polymerase II promoter	10	ATF2, TGFB1, POU2F1, HLF, NFYA, PLAGL1, TCF12, SOX10, ATF6, GTF2I	7.45543e-07
GOTERM_BP_DIRECT	GO:0006357~regulation of transcription from RNA polymerase II promoter	9	ATF2, POU2F1, HLF, NFYA, PLAGL1, TCF7, TCF12, SOX10, ATF6	0.000120645
GOTERM_BP_DIRECT	GO:0045893~positive regulation of transcription, DNA-templated	6	TGFB1, TBP, NFYA, NOTCH4, BRCA2, SOX10	0.000545229
GOTERM_BP_DIRECT	GO:0000122~negative regulation of transcription from RNA polymerase II promoter	6	ATF2, TGFB1, NOTCH4, PLAGL1, SKIL, SOX10	0.00205714
GOTERM_BP_DIRECT	GO:0071479~cellular response to ionizing radiation	2	TGFB1, BRCA2	0.039552
GOTERM_BP_DIRECT	GO:0043491~protein kinase B signaling	2	TGFB1, RPS6KB2	0.0499086
GOTERM_BP_DIRECT	GO:0002244~hematopoietic progenitor cell differentiation	2	ATF2, TGFB1	0.0712224
GOTERM_BP_DIRECT	GO:0045444~fat cell differentiation	2	ATF2, FAM120B	0.0730542
GOTERM_BP_DIRECT	GO:0030509~BMP signaling pathway	2	ATF2, TGFB1	0.0830682
GOTERM_BP_DIRECT	GO:0007179~transforming growth factor beta receptor signaling pathway	2	TGFB1, SKIL	0.0947707
GOTERM_BP_DIRECT	GO:0042060~wound healing	2	TGFB1, NOTCH4	0.0965585
GOTERM_BP_DIRECT	GO:0070306~lens fiber cell differentiation	3	KDM5B, TGFB1, SKIL	9.53518e-05
GOTERM_BP_DIRECT	GO:0045596~negative regulation of cell differentiation	3	TGFB1, NOTCH4, SKIL	0.00177896
GOTERM_BP_DIRECT	GO:0045892~negative regulation of transcription, DNA-templated	5	KDM5B, TGFB1, POU2F1, TCF7, SOX10	0.00232375
GOTERM_BP_DIRECT	GO:0006355~regulation of transcription, DNA-templated	5	ATF2, NFYA, NOTCH4, TCF7, BRCA2	0.0137678
GOTERM_BP_DIRECT	GO:0014003~oligodendrocyte development	2	TGFB1, SOX10	0.0262161
GOTERM_BP_DIRECT	GO:0042789~mRNA transcription from RNA polymerase II promoter	2	ATF2, TBP	0.0452142
GOTERM_BP_DIRECT	GO:0030097~hemopoiesis	2	NOTCH4, BRCA2	0.0629367
GOTERM_BP_DIRECT	GO:0050680~negative regulation of epithelial cell proliferation	2	ATF2, TGFB1	0.0657064
